# Supplementary material for: A Digital Capabilities Dataset From Small- and Medium-Sized Enterprises in the Basque Country (Spain)
Source: PubMed Central journal article supplement (PMC7875880; doi:10.3389/fpsyg.2020.587949), 2021-01-28
Supplement: Presentation_1.pdf [file Presentation_1.pdf]

## Appendix: Questionnaire based on DIGROW framework

### I. Sensing digitally enabled growth potentials

| Dimension                                                                                                                                               | Level 0                                                      | Level 1                                                                                                | Level 2                                                                              | Level 3                                                                | Level 4                                                                                                                                 | Level 5                                                                                                                                                                                                                                                                |
|---------------------------------------------------------------------------------------------------------------------------------------------------------|--------------------------------------------------------------|--------------------------------------------------------------------------------------------------------|--------------------------------------------------------------------------------------|------------------------------------------------------------------------|-----------------------------------------------------------------------------------------------------------------------------------------|------------------------------------------------------------------------------------------------------------------------------------------------------------------------------------------------------------------------------------------------------------------------|
| <b>Searching for digitally enabled growth opportunities</b>                                                                                             | Digitalization is rather a threat than an opportunity for us | We are planning to identify opportunities                                                              | We have started to look for digital enabled growth opportunities                     | We have spotted some opportunities                                     | We identify digital enabled growth opportunities, but not systematically                                                                | Our company identifies systematically digitally enabled growth opportunities                                                                                                                                                                                           |
| <b>Understanding and developing digital customer needs</b>                                                                                              | No understanding of digital customer needs                   | We are planning to talk to customers and analyze digital needs                                         | We have talked to some customers about digitalization                                | We have analyzed some customer segments                                | We have a clear understanding how our most important customer segments are changing in the digital environment and what their needs are | There is genuine and systematic understanding of how each of our customer segments are changing in the digital environment, what their needs are, and how to address them                                                                                              |
| <b>Sensing technology driven opportunities</b>                                                                                                          | No digital / technological innovation                        | We react on digital technology of competitors                                                          | We observe new digital technologies/ applications<br><br>And how they could serve us | We appropriated some new digital technology                            | We analyze how some technology driven opportunities can create value for specific customer segments and we address them properly        | Our company takes a systematic and proactive approach to technology driven product/service innovation in the digital environment                                                                                                                                       |
| <b>Use of external sources for digital innovation: (potential) customers, universities, research centers, “the crowd”, partners in the “eco-system”</b> | No use of external sources                                   | We are planning to collect ideas from customers and other stakeholders (providers, universities, etc.) | We have started to use external sources from different players                       | External sources have contributed to identify innovation opportunities | We collaborate regularly with some external partners to search for and develop digitally enabled growth opportunities                   | We practice a systematic and proactive open innovation approach: Invite customers/ potential clients to provide feed-back and ideas via digital platforms (Crowdsourcing), we collaborate intensively with further external sources such as providers and universities |

## II. Developing a digitally enabled growth strategy and mindset

| Dimension                                          | Level 0                                            | Level 1                                                                 | Level 2                                                                                                   | Level 3                                                                                               | Level 4                                                                         | Level 5                                                                                                                              |
|----------------------------------------------------|----------------------------------------------------|-------------------------------------------------------------------------|-----------------------------------------------------------------------------------------------------------|-------------------------------------------------------------------------------------------------------|---------------------------------------------------------------------------------|--------------------------------------------------------------------------------------------------------------------------------------|
| <b>Digitally enabled growth strategy</b>           | No digitally enabled growth strategy               | We react on changing strategies of competitors                          | There is some understanding of how digital solutions will help us to deliver the firm's objectives        | We have started to review our strategy regarding digitally enabled growth.                            | We have updated our strategy regarding some aspects of digitally enabled growth | We have a consistent digitally enabled innovation & growth strategy in alignment with our resources                                  |
| <b>Digital Leadership</b>                          | No interest of leaders in digitally enabled growth | Reactive leadership. We prefer to firstly see what competitors do.      | Leaders recognize potential of digitally enabled growth                                                   | Leaders motivate and support people for digital change                                                | Leaders activate employees for digital initiatives                              | Digital initiatives have high priority There is a defined position/role to launch, coordinate and monitor digital initiatives        |
| <b>Digital mindset (attitudes &amp; behaviors)</b> | Digitally averse                                   | We have some "digital natives" in our firm and they behave accordingly. | People in our firm start thinking about digitalization and managers are developing new digital behaviors. | There is a generally positive attitude towards digitalization and broad development of new behaviors. | Most people in our firm are motivated to seize digital opportunities            | Everyone in the firm shares an understanding of our digital vision and has favorable attitudes and behaviors towards digitalization. |
| <b>Empowered employees</b>                         | No empowerment of employees                        | Some employees have started digital initiatives on their own            | We collect ideas of employees for digital innovations                                                     | Employees are encouraged to experiment with digital initiatives                                       | Digital initiatives managed by employees have been implemented                  | Employees are fully empowered to experiment with digital initiatives and implement them.                                             |

### III. Seizing digitally enabled growth potentials

| Dimension                                                            | Level 0                                                     | Level 1                                                                                              | Level 2                                                                                                        | Level 3                                                                                                                           | Level 4                                                                                                                                                                                          | Level 5                                                                                                                                                                                                                |
|----------------------------------------------------------------------|-------------------------------------------------------------|------------------------------------------------------------------------------------------------------|----------------------------------------------------------------------------------------------------------------|-----------------------------------------------------------------------------------------------------------------------------------|--------------------------------------------------------------------------------------------------------------------------------------------------------------------------------------------------|------------------------------------------------------------------------------------------------------------------------------------------------------------------------------------------------------------------------|
| <b>Digitally enabled business models</b>                             | No digitally enabled business models                        | We have a reactive approach. First, we see what competitors are doing or changing                    | We are looking for new/improved/innovative business models                                                     | We have started to change some components of our business model (e.g. sales channels, value proposition)                          | Our new business models already contribute to increased revenues                                                                                                                                 | We systematically adapt our business models or create new ones for digital enabled growth, including customer segments, channels, activities/resources and the value proposition                                       |
| <b>Digital market presence</b>                                       | No digital market presence                                  | Website not actively managed, some presence in social networks (e.g. Facebook, Twitter, or LinkedIn) | Customer-oriented website and presence in several social media.                                                | Actively managed digital market presence through internal resources, collaboration with partners or external service provider.    | Our firm has a digital presence and continuously develops different activities to keep ourselves at the top of mind (e.g. digital marketing campaigns, blogs, videos, digital communities, etc.) | Our firm has a broad and integrated <i>digital</i> presence across several media through different digital activities. We regularly measure the impact of our digital market presence                                  |
| <b>Digital Customer experience</b>                                   | No digital customer experience                              | Our company has started to interact with customers digitally (e.g.e-mail, online-feedback)           | We have at least one well established online channel to deliver customer services and interact with customers. | We actively use customer data for data-driven services. We interact with some customer segments digitally                         | We mainly interact with customers digitally. Revenues (% of sales) are generated by data-driven services                                                                                         | The firm successfully interacts with (potential) customers and delivers customer service across multiple digital channels, an important part of revenues is generated by data-driven (online) services (% of revenues) |
| <b>Agile implementation/deployment of digitalization initiatives</b> | No projects neither methodologies for digital opportunities | Some digital projects have been started, but without using any specific methodology.                 | Some digital projects have been started and they are following a specific methodology                          | Digital projects have been started and they have included some techniques to quickly respond to customers' needs and requirements | Some digital projects are based on agile methodologies                                                                                                                                           | The organization has adopted agile methodologies to develop its digital initiatives and this is managed based on a structured method                                                                                   |

#### IV. Managing resources for digital transformation

| Dimension                                | Level 0                                                                     | Level 1                                                                                                                                | Level 2                                                                                                     | Level 3                                                                                                                                      | Level 4                                                                                                                                        | Level 5                                                                                                                                                                                                                           |
|------------------------------------------|-----------------------------------------------------------------------------|----------------------------------------------------------------------------------------------------------------------------------------|-------------------------------------------------------------------------------------------------------------|----------------------------------------------------------------------------------------------------------------------------------------------|------------------------------------------------------------------------------------------------------------------------------------------------|-----------------------------------------------------------------------------------------------------------------------------------------------------------------------------------------------------------------------------------|
| <b>Digital skills &amp; Learning</b>     | No digital skills. No training for the development of digital skills.       | Low level of digital skills and/or low investment to develop digital capabilities.                                                     | Adequate level of digital skills in few relevant fields or business areas.                                  | Adequate level of digital skills in some relevant fields or business areas                                                                   | Significant level of digital skills in most relevant fields or business areas. Specific program for the development of digital skills.         | Employees possess all necessary digital skills, which are updated regularly through a formal learning and development program.                                                                                                    |
| <b>Digital processes</b>                 | No digitalization of processes                                              | Digitalization of processes is planned                                                                                                 | Process digitalization is under way                                                                         | Few internal processes and interactions with external partners already digitalized                                                           | Many internal processes and interactions with external partners already digitalized                                                            | Most of processes and interactions with external partners have been digitalized and a formal managerial process to monitor them is in place                                                                                       |
| <b>Digital technology &amp; security</b> | Only minimum digital technology in place. Very limited IT security measures | First attempts to adopt digital technology. Regular backup of data, up-to-date antivirus software, further security solutions planned. | Digital technology already adopted in few areas or processes. Few IT and cybersecurity measures are planned | Digital technology starts to be considered a critical enabler for business strategy. Some IT & cybersecurity measures have been implemented. | State-of-the art digital technology supports critical processes and the business strategy; IT security is ensured for the most critical areas. | Effective technology planning, deployment, integration and use to support the digital enabled business. Comprehensive IT security solutions have been implemented for all relevant areas. There is a cybersecurity plan in place. |
| <b>Digital investments</b>               | No investments related to digitalization                                    | Initial investments in one area or process                                                                                             | Low level of investment on digital initiatives                                                              | Medium level of investment on digital initiatives                                                                                            | Significant level of investment on digital initiatives in specific business areas                                                              | High level of investment on digital initiatives on all areas of the company based on an integrated business strategy and digital plan                                                                                             |
